# Supplementary material for: Nitrogen-Rich Polyacrylonitrile-Based Graphitic Carbons for Hydrogen Peroxide Sensing
Source: MDPI journal article supplement (doi:10.3390/s17102407), 2017-10-21
Supplement: s1 [file s1]

Supplementary Information

# Nitrogen-Rich Polyacrylonitrile-Based Graphitic Carbons for Hydrogen Peroxide Sensing

Brandon Pollack, Sunshine Holmberg, Derosh George, Ich Tran, Marc Madou and Maziar Ghazinejad

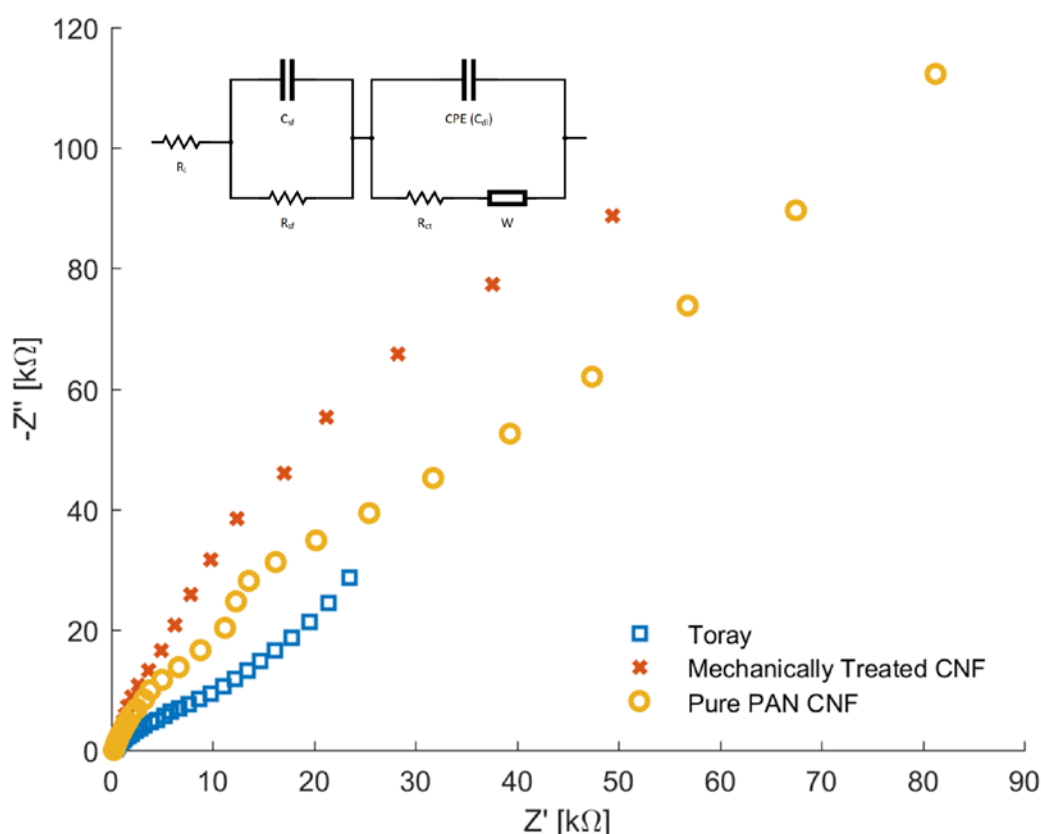

**Figure S1.** Nyquist Plots of the Electrochemical Impedance Spectroscopy (EIS) for the Toray, Mechanically Treated CNF, and Pure PAN CNF electrodes. The equivalent electrical circuit is shown in the inset. In equivalent circuit,  $R_i$  represents the internal resistance,  $R_{sf}$  represents the surface resistance,  $C_{sf}$  represents the surface Capacitance, and  $R_{ct}$  represents the charge-transfer resistance. The double layer capacitance ( $C_{dl}$ ) is modeled as a Constant Phase Element (CPE) and diffusion affects are represented by the Warburg element ( $W$ ).

**Table S1.** Double layer capacitance, Geometric Surface Area, and Active Surface Area of electrodes.

| Electrode                | $C_{dl}$ ( $\mu\text{F}/\text{cm}^2$ ) | $A_g$ ( $\text{cm}^2$ ) | $A_{act}$ ( $\text{cm}^2$ ) |
|--------------------------|----------------------------------------|-------------------------|-----------------------------|
| Pure PAN CNF             | 65.6                                   | 0.15                    | 0.882                       |
| Mechanically Treated CNF | 291.0                                  | 0.1                     | 1.13                        |

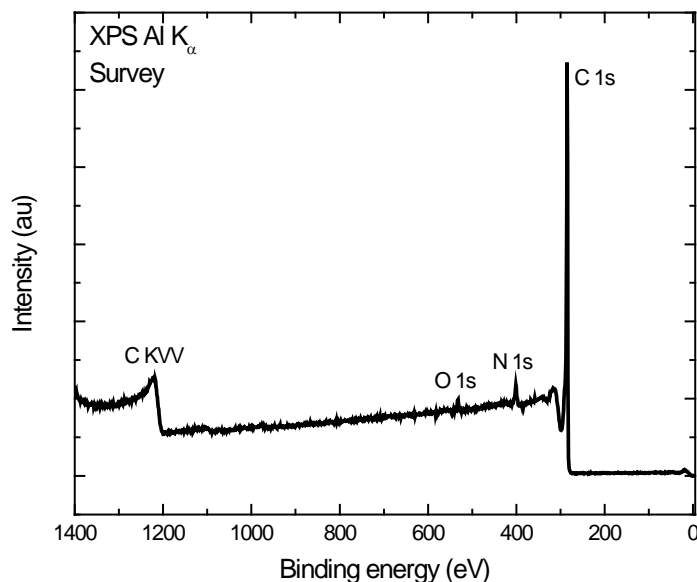

**Figure S2.** Wide XPS spectrum of the mechanically treated CNF.

It was observed that the percentage of oxygen (~1 at. %) in the sample is significantly small as compared to nitrogen (~4.5 at. %). Although the presence of oxygen may also influence the catalytic behavior of the material, the effect of nitrogen prevails [1]. The oxygen peak, deconvoluted for C–O, O–C=O and O–H, is shown in Figure S3.

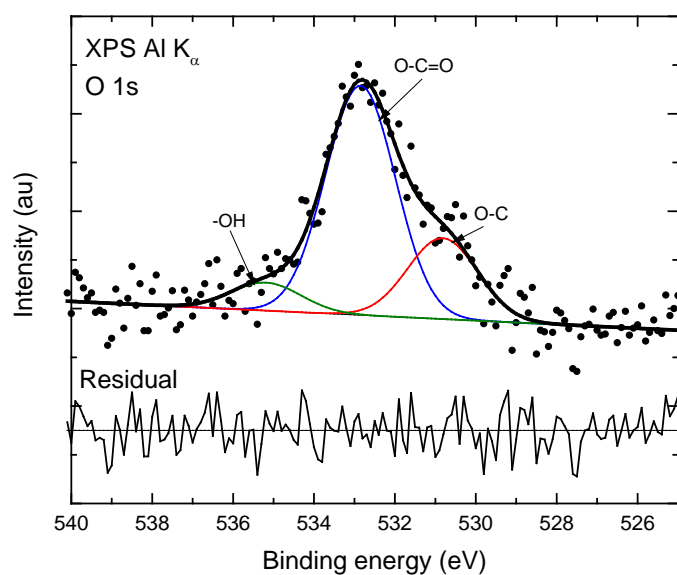

**Figure S3.** High resolution O 1s XPS spectra of mechanically treated CNF.

- [1] Y. Shao, S. Zhang, M. H. Engelhard, G. Li, G. Shao, Y. Wang, J. Liu, I. A. Aksay, and Y. Lin, J. Mater. Chem. **20**, 7491 (2010).

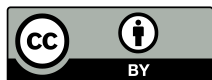

© 2017 by the authors. Submitted for possible open access publication under the terms and conditions of the Creative Commons Attribution (CC BY) license (<http://creativecommons.org/licenses/by/4.0/>).
